# Supplementary material for: Metabolome Mining of Curcuma longa L. Using HPLC-MS/MS and Molecular Networking
Source: Preprints.org preprint supplement (doi:10.20944/preprints202306.1846.v1), 2023-06-27
Supplement: Supplementary file 2 [file supplementary]

**Metabolome Mining of *Curcuma longa* L. Using HPLC-MS/MS and Molecular Networking**

Rabin Budhathoki1, Arjun Prasad Timilsina1, Bishnu P. Regmi2, Khaga Raj Sharma1, Niraj Aryal3,* and Niranjan Parajuli1,*

1Biological Chemistry Lab, Central Department of Chemistry, Tribhuvan University, Kirtipur, Kathmandu, 44618, Nepal

2Department of Chemistry, Florida Agricultural and Mechanical University, Tallahassee, FL 32307, USA

3Department of Biology, University of Florida, Gainesville, FL 32611, USA

*Corresponding authors: [niraj.aryal@ufl.edu](mailto:niraj.aryal@ufl.edu) (N.A.); [niranjan.parajuli@cdc.tu.edu.np](mailto:niranjan.parajuli@cdc.tu.edu.np) (N.P.), Tel: +977-1-4332034

Rabin Budhathoki: 0009-0001-9116-366X

Arjun Prasad Timilsina: 0000-0003-3131-390X

Bishnu P. Regmi: [0000-0001-7690-9825](https://orcid.org/0000-0001-7690-9825)

Khaga Raj Sharma: [0000-0002-1555-0887](https://orcid.org/0000-0002-1555-0887)

Niraj Aryal: 0000-0001-6145-9657

Niranjan Parajuli: 0000-0002-9233-6489


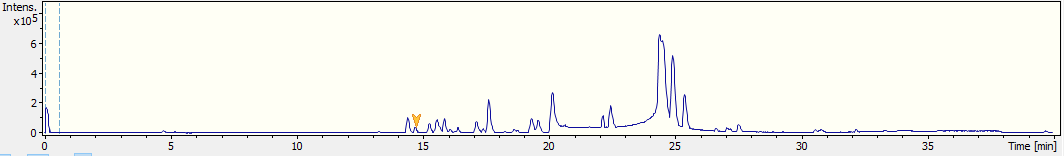

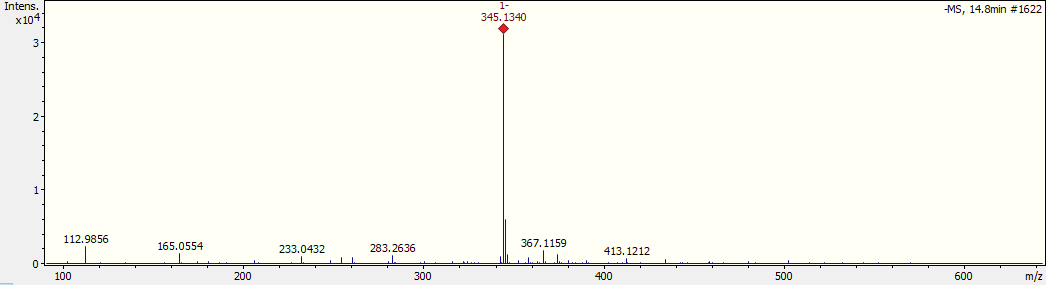

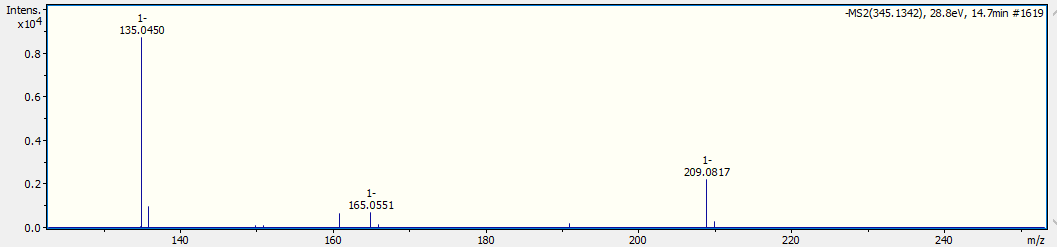
**Figure S1**. MS1 and MS2 spectra of compound 1


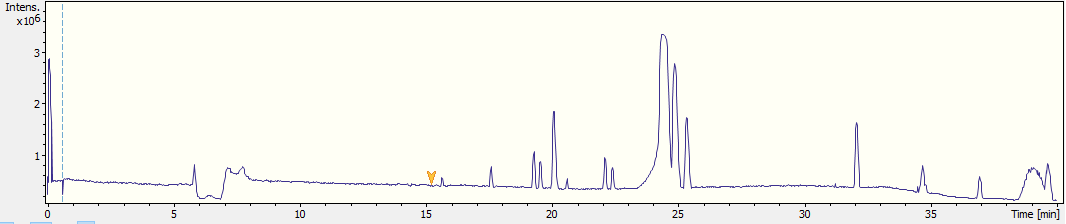

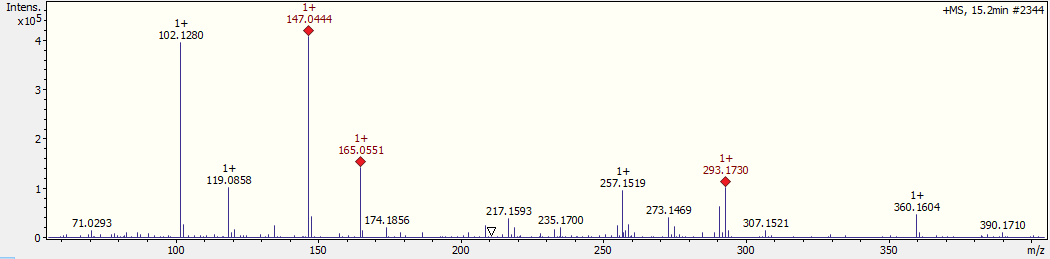

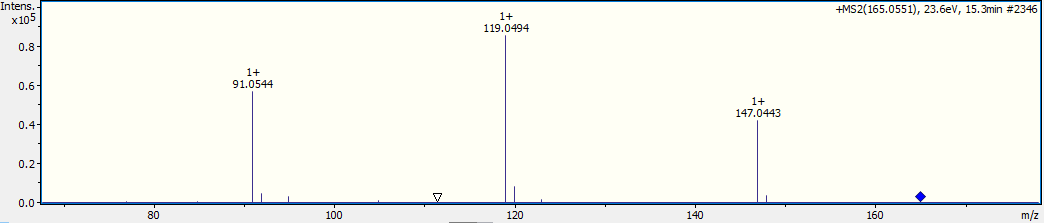
 **Figure S2**. MS1 and MS2 spectra of compound 2


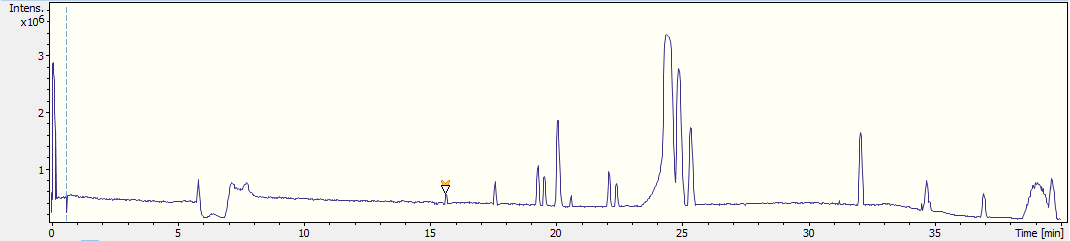

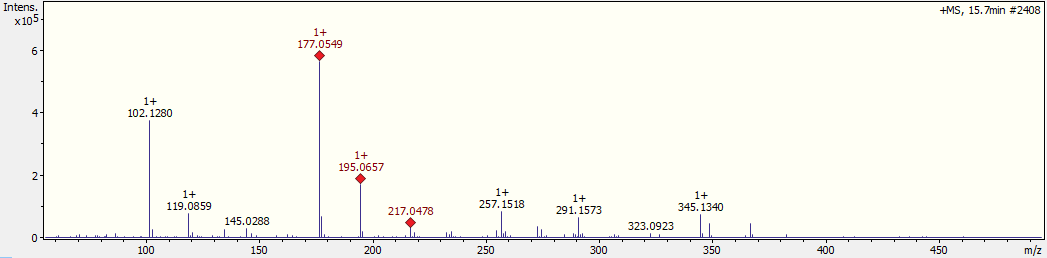

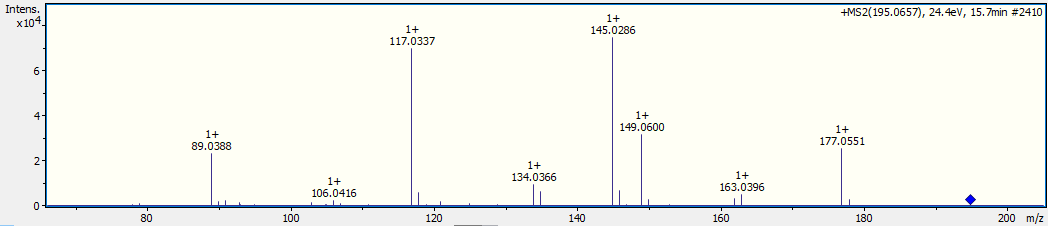


Figure S3. MS1 and MS2 spectra of compound 3

**
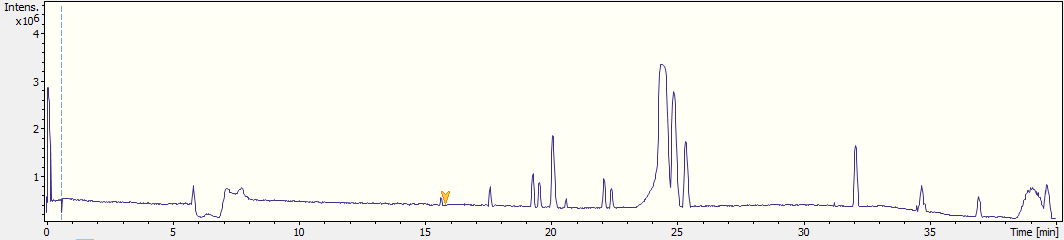

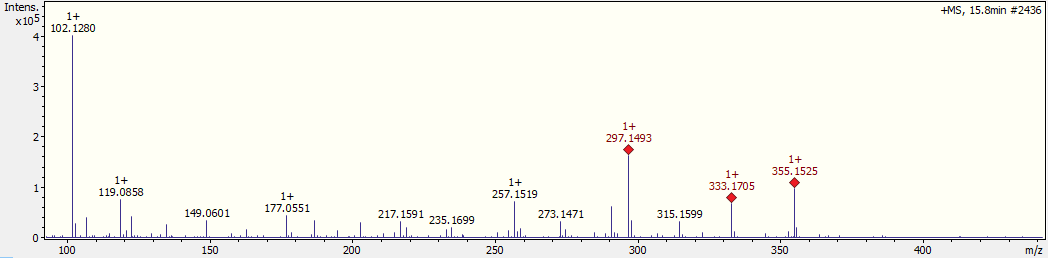

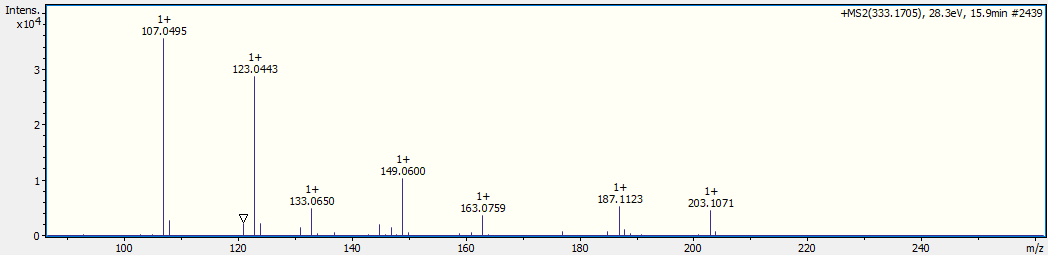
**

Figure S4. MS1 and MS2 spectra of compound 4

**
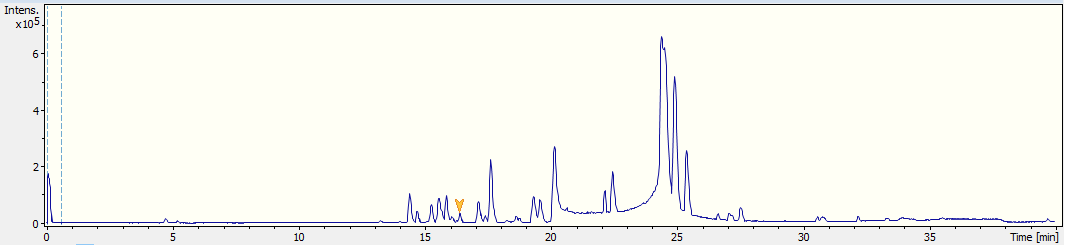

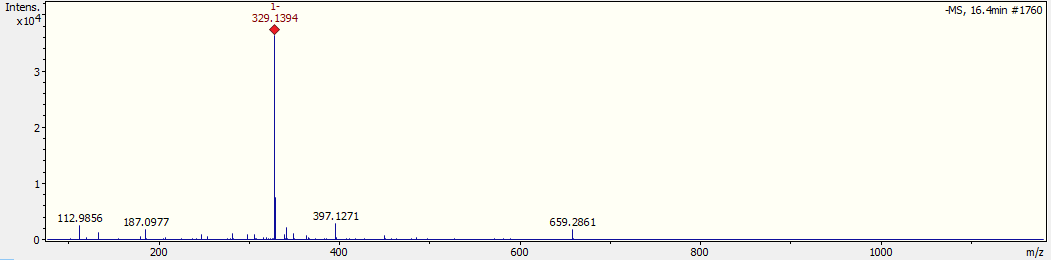

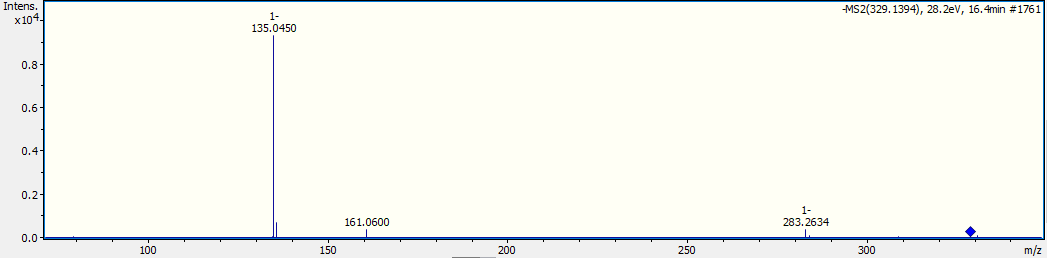
**

Figure S5. MS1 and MS2 spectra of compound 5


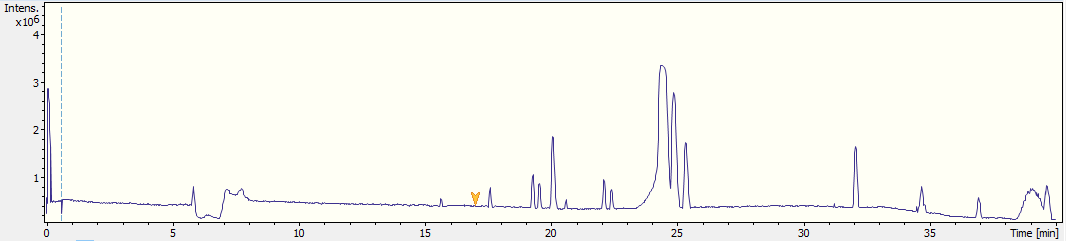

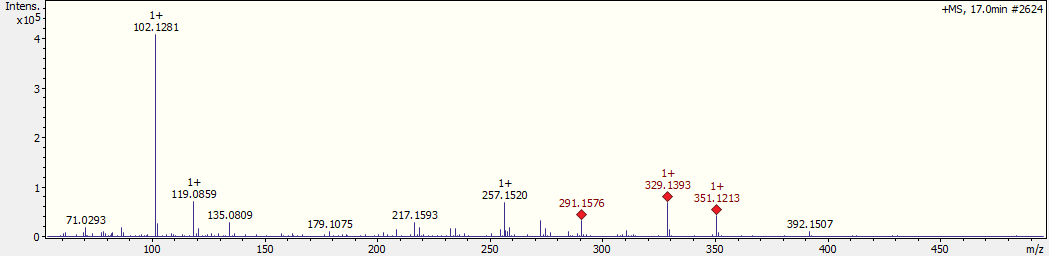

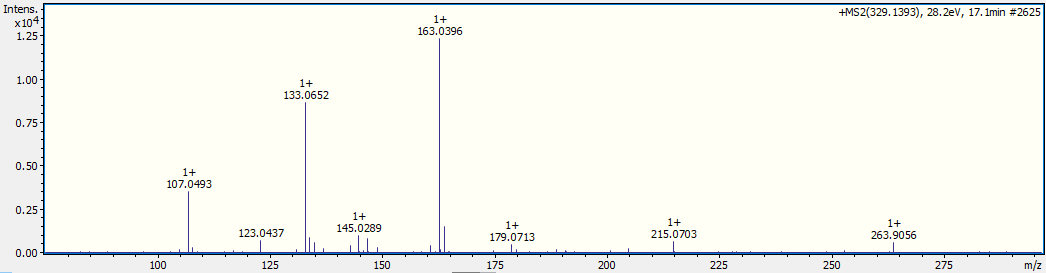


Figure S6. MS1 and MS2 spectra of compound 6


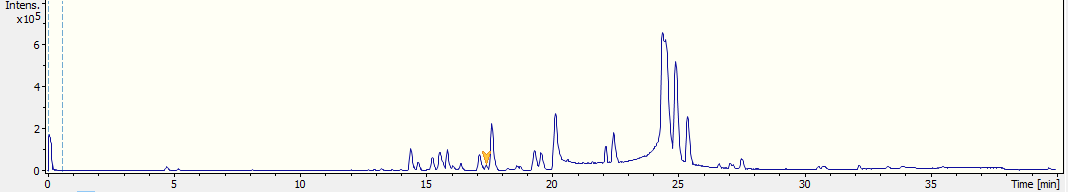

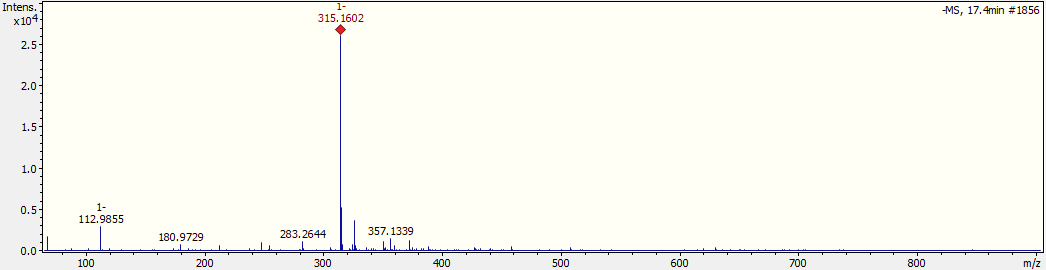

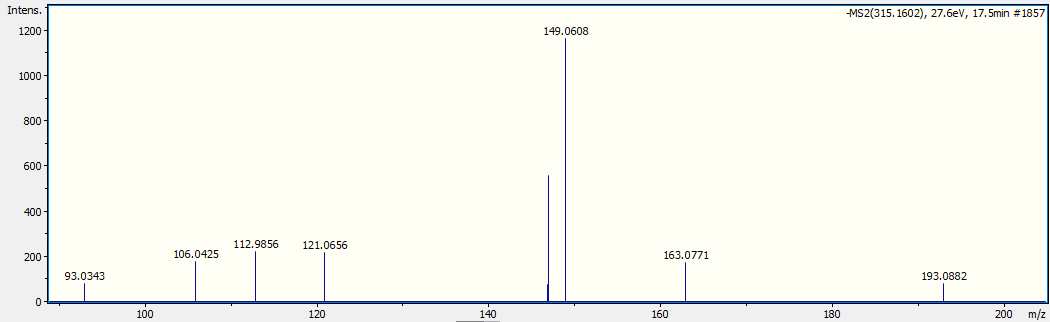


Figure S7. MS1 and MS2 spectra of compound 7


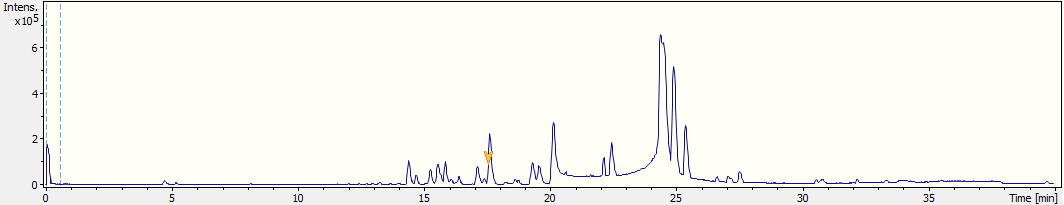

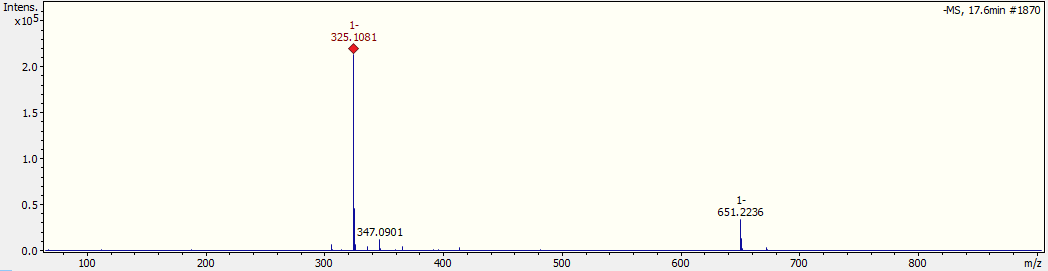

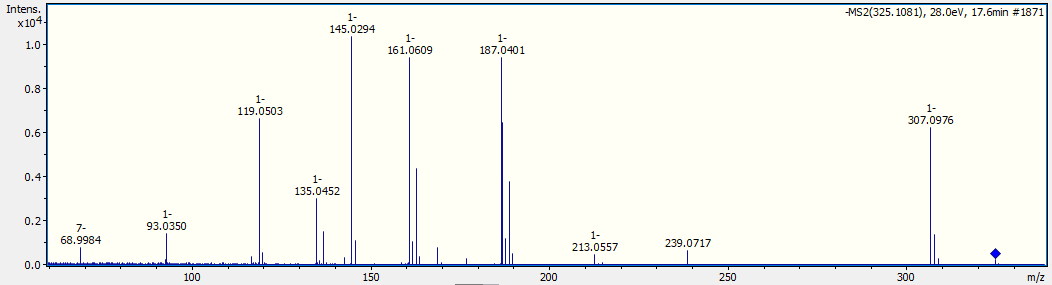


Figure S8. MS1 and MS2 spectra of compound 8


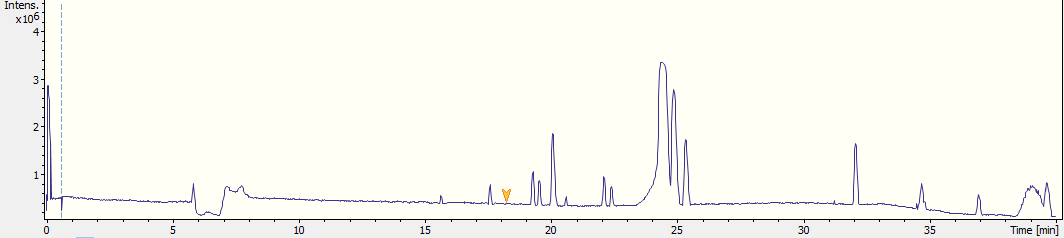

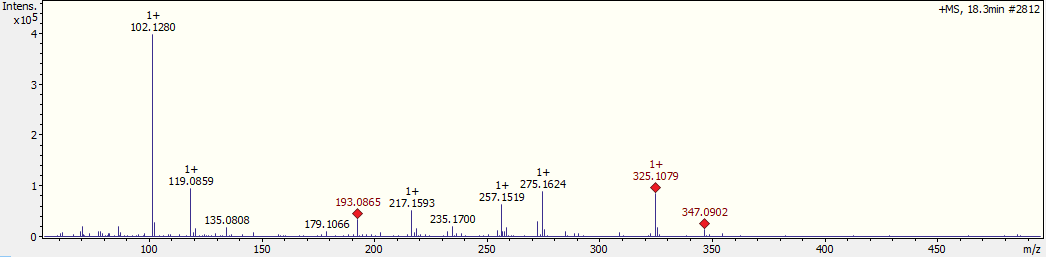

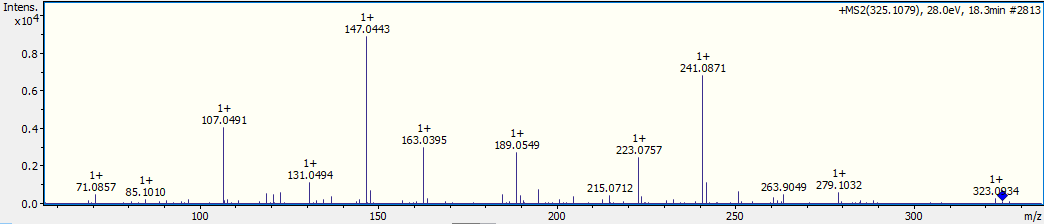


Figure S9. MS1 and MS2 spectra of compound 9


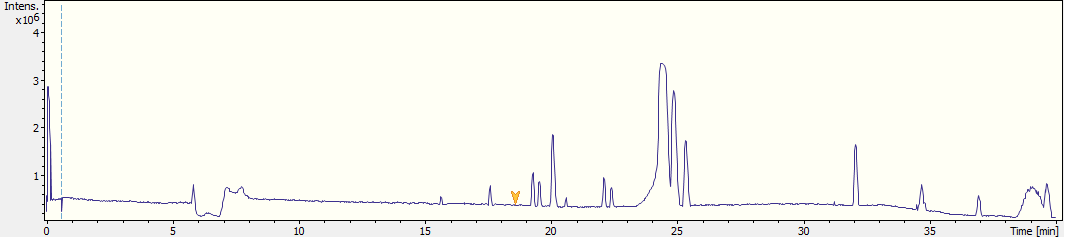

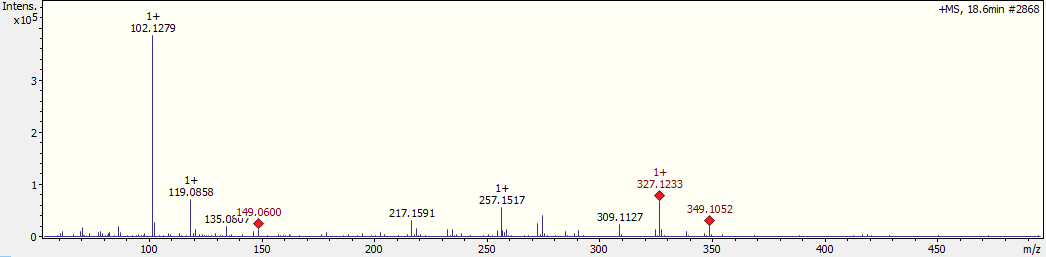

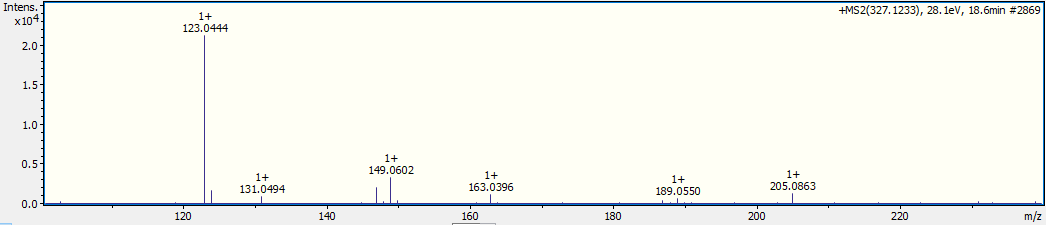


Figure S10. MS1 and MS2 spectra of compound 10


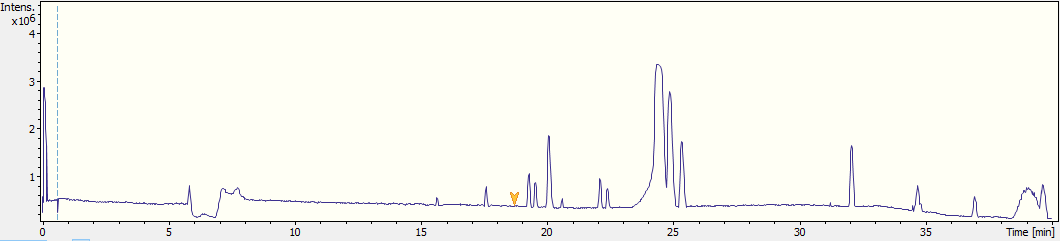

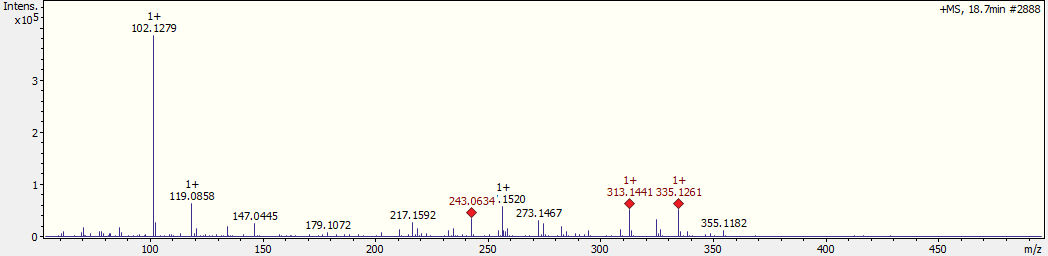

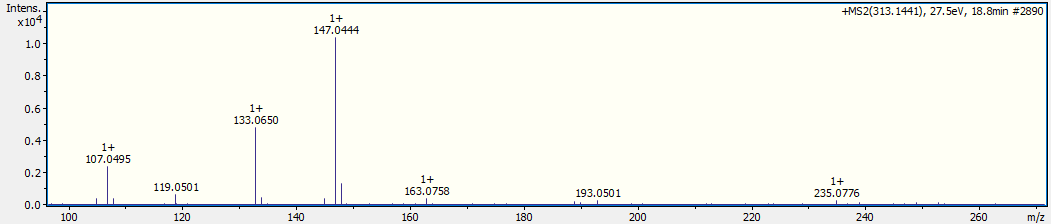


Figure S11. MS1 and MS2 spectra of compound 11


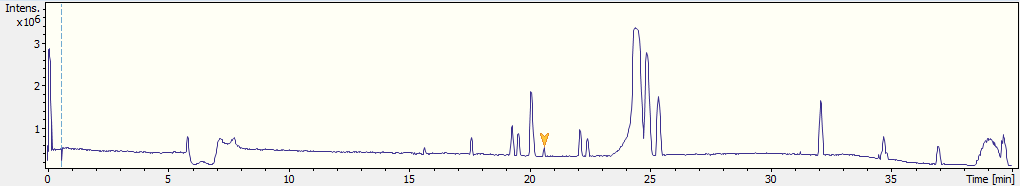

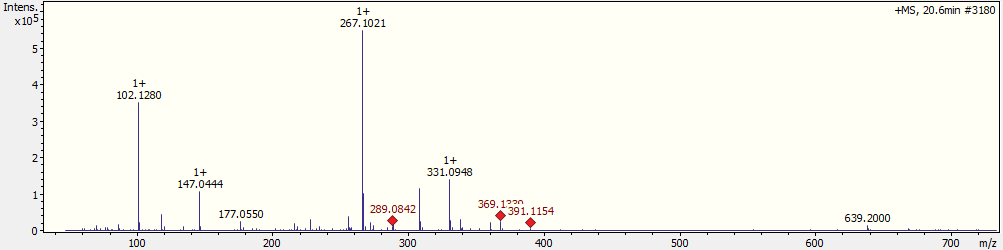

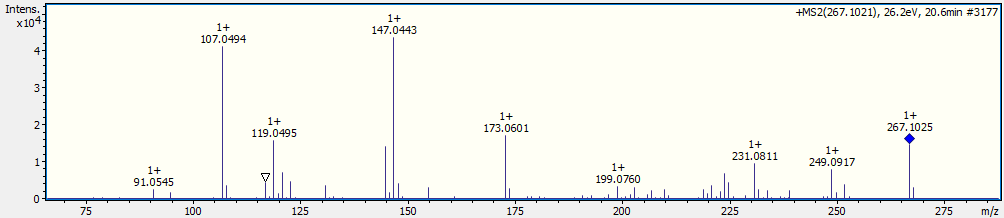


**Figure S12.** MS1 and MS2 spectra of compound 12


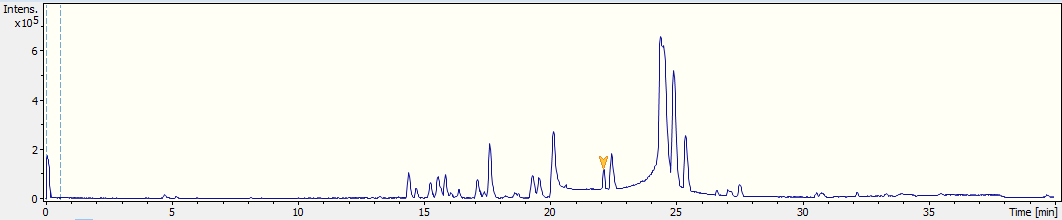

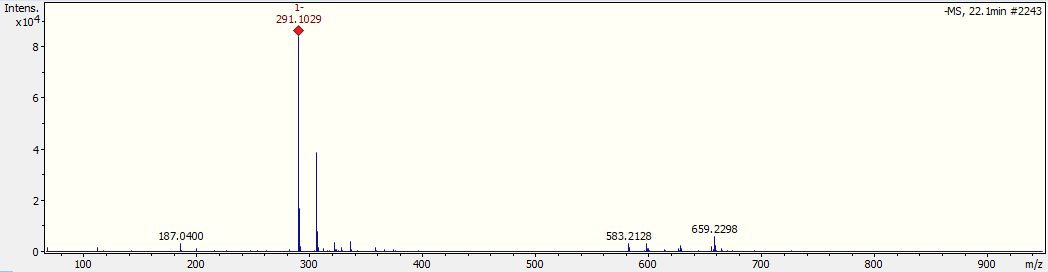

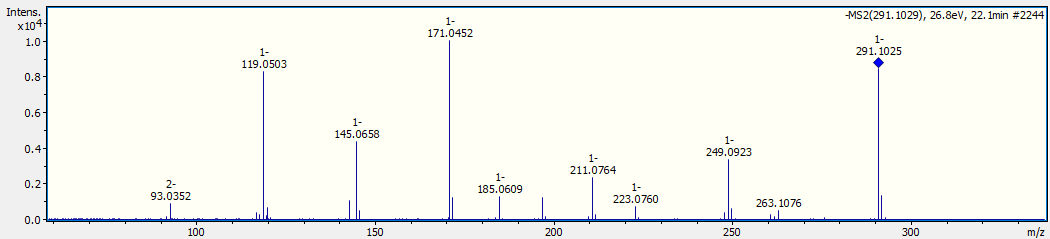


Figure S13. MS1 and MS2 spectra of compound 13


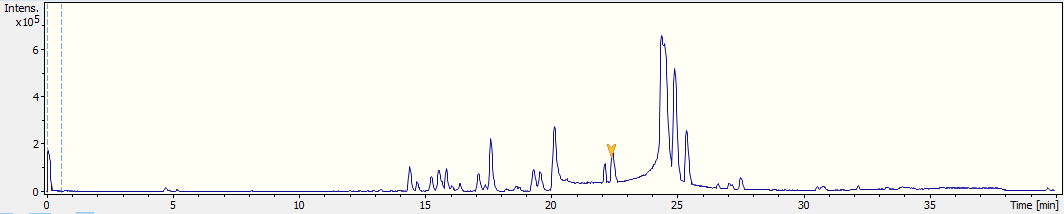

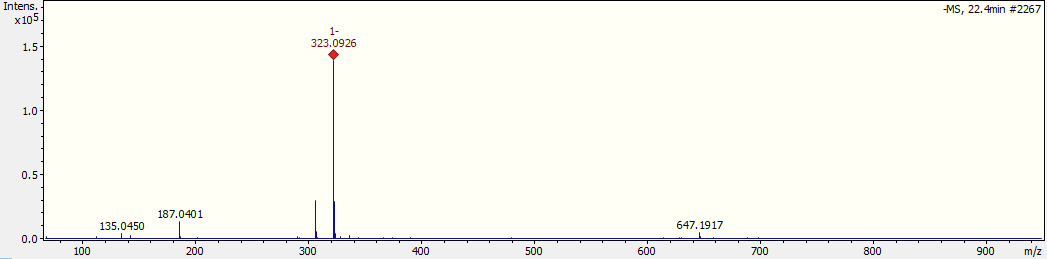

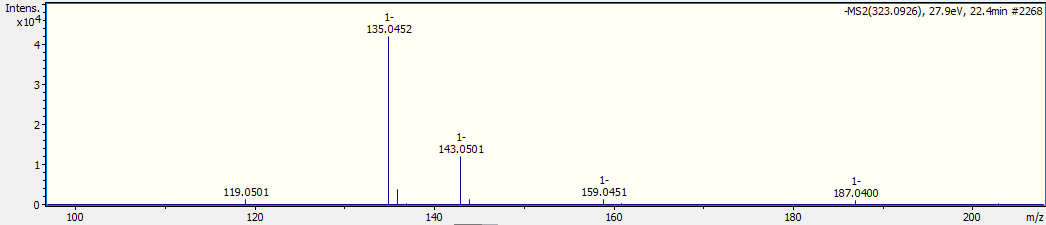


Figure S14. MS1 and MS2 spectra of compound 14


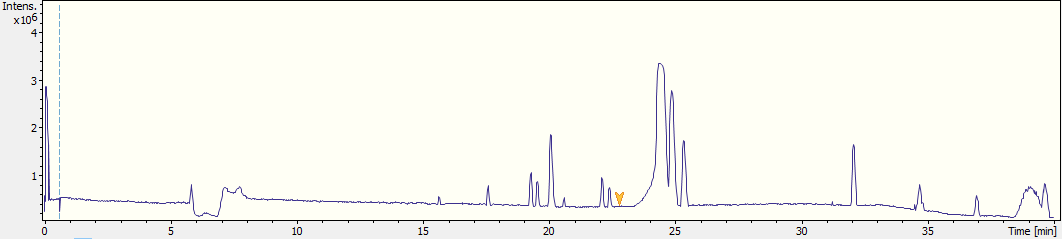

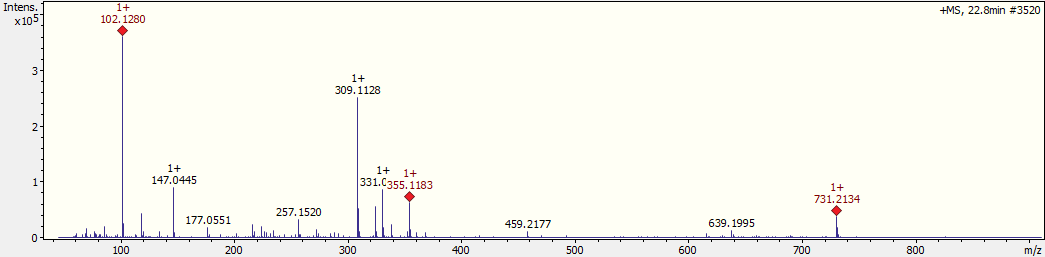

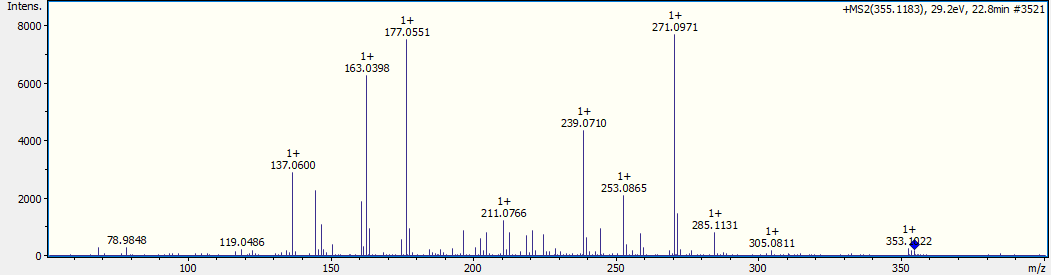


Figure S15. MS1 and MS2 spectra of compound 15


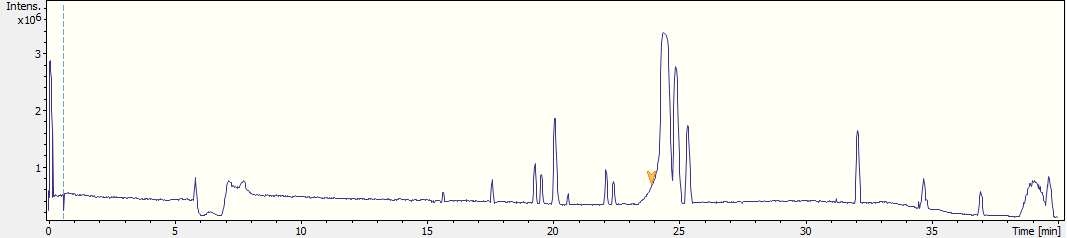

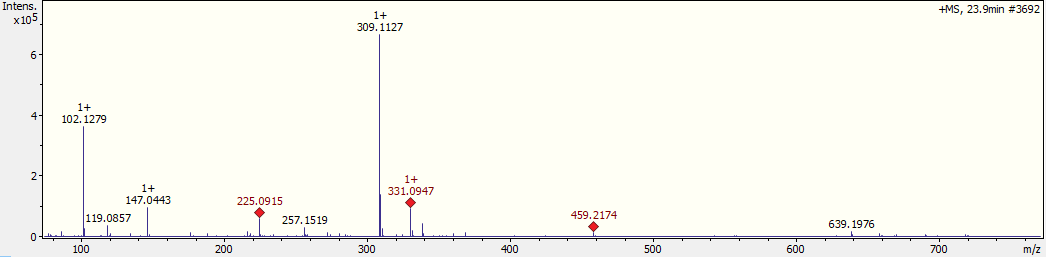

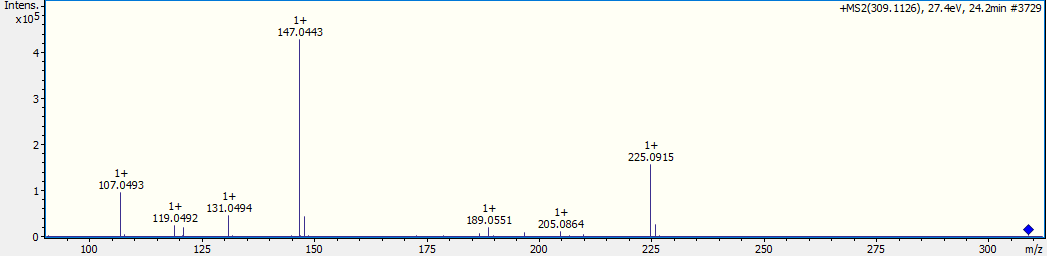


Figure S16. MS1 and MS2 spectra of compound 16


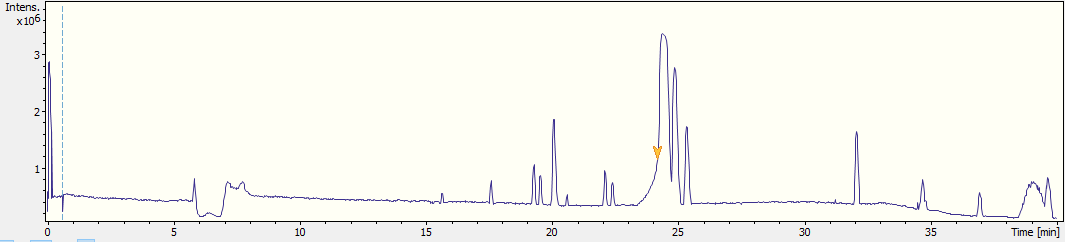

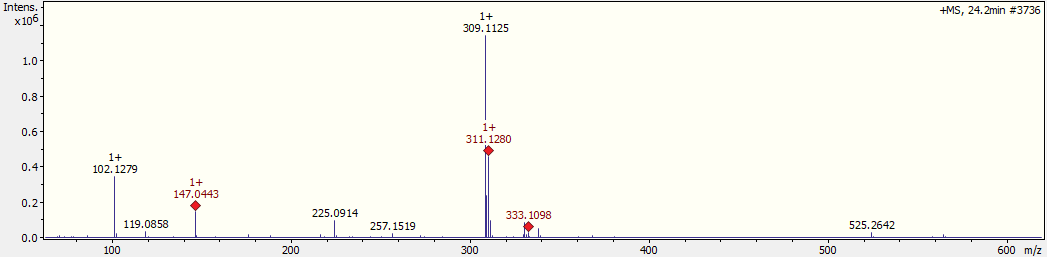

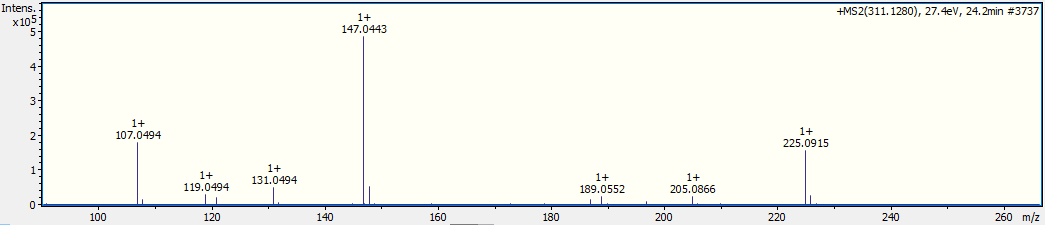


Figure S17. MS1 and MS2 spectra of compound 17


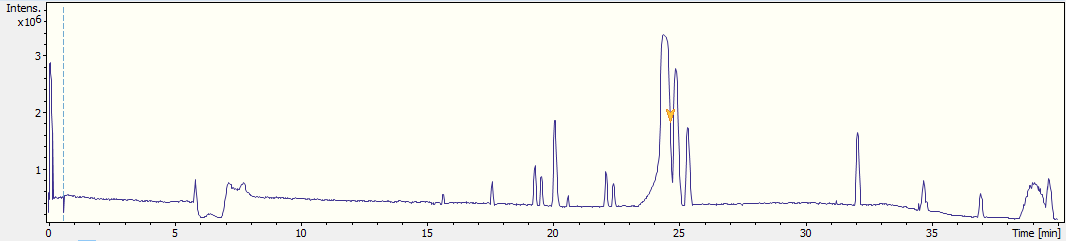

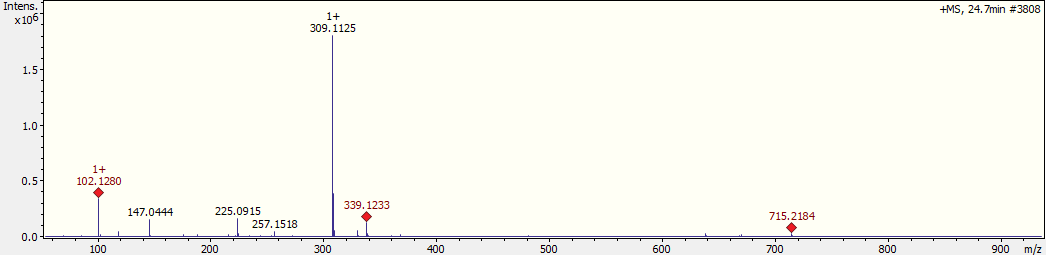

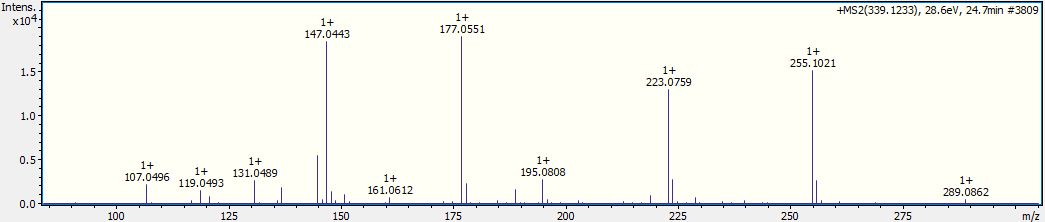


Figure S18. MS1 and MS2 spectra of compound 18


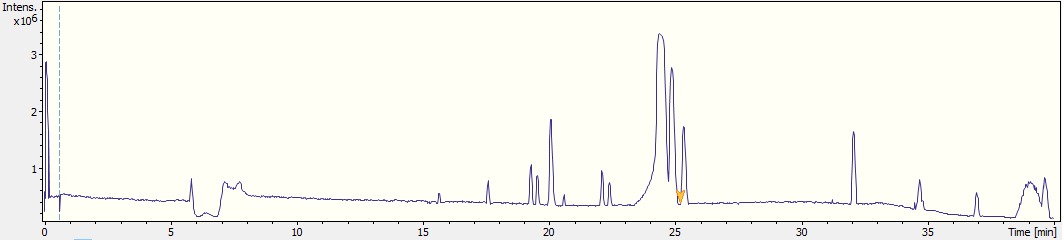

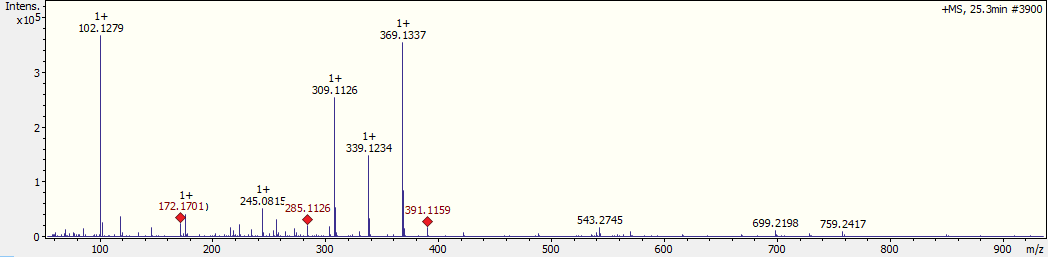

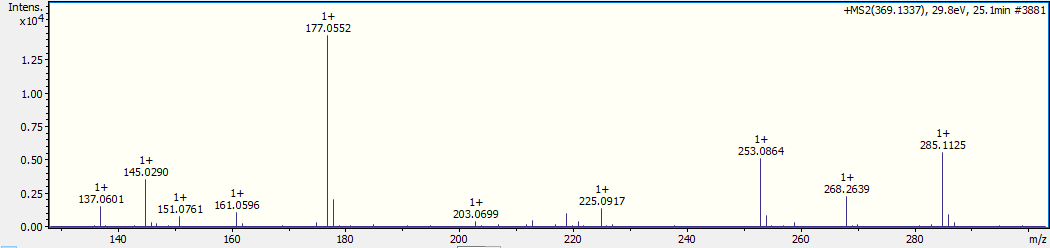


Figure S19. MS1 and MS2 spectra of compound 19


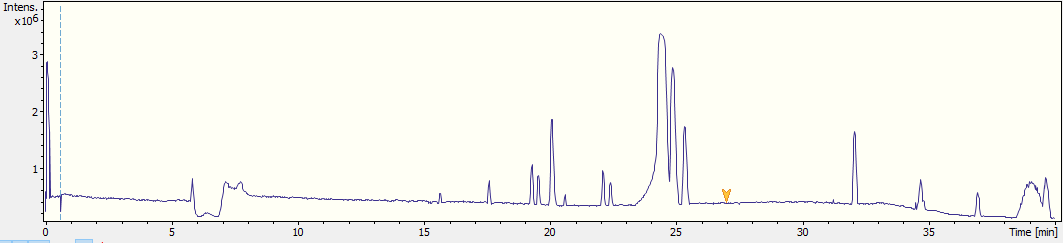

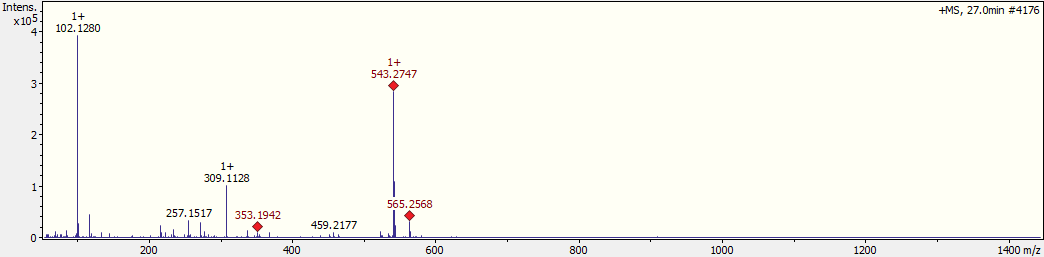

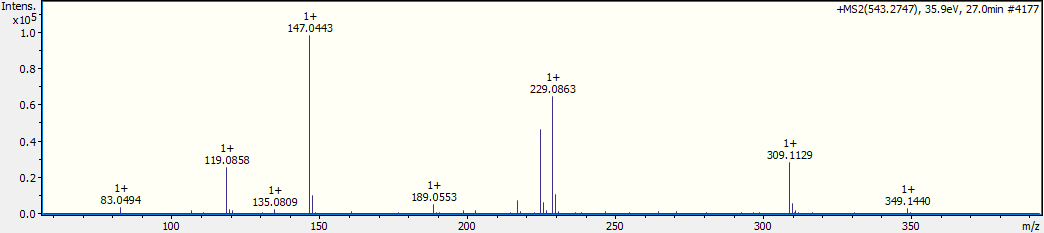


Figure S20. MS1 and MS2 spectra of compound 20


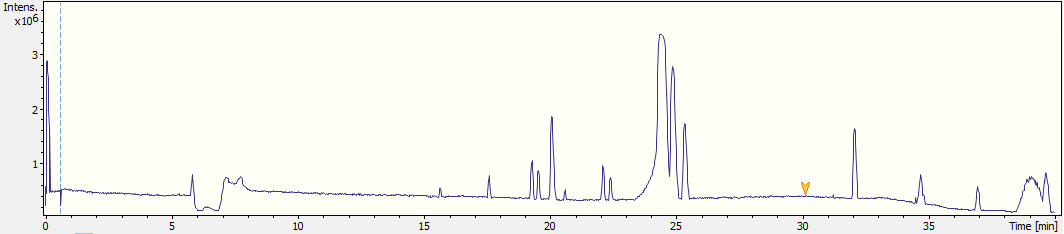

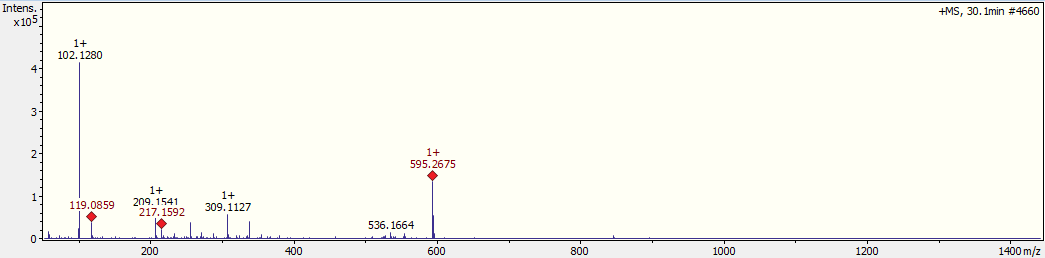

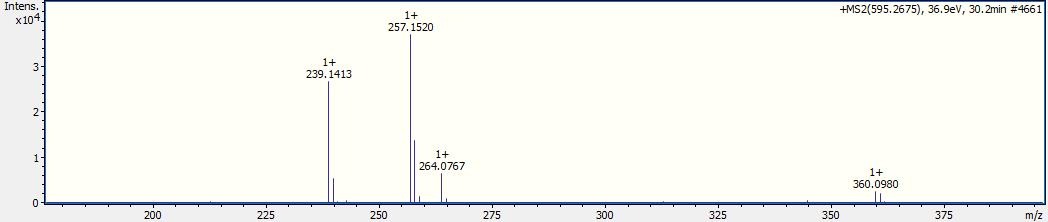


Figure S21. MS1 and MS2 spectra of compound 21


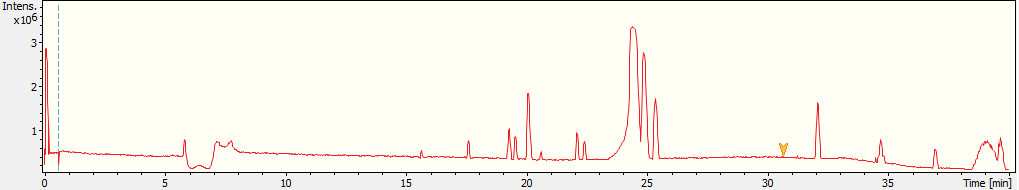

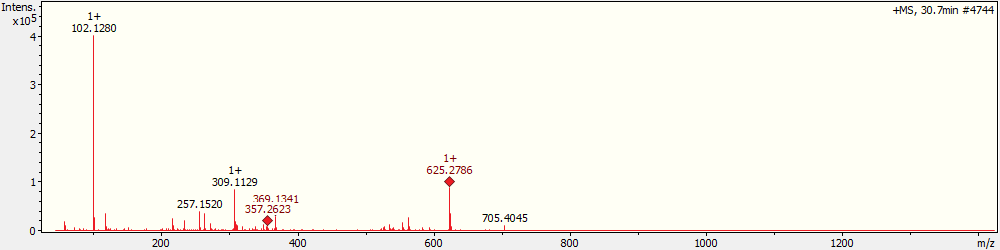

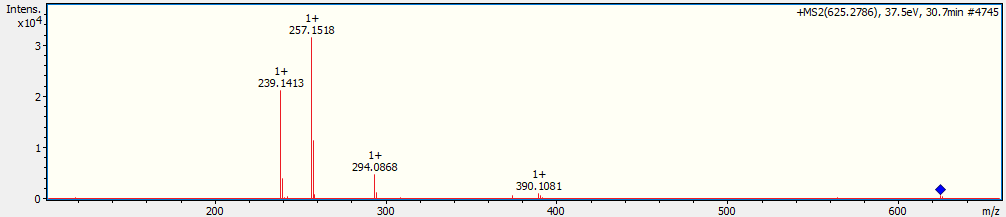


**Figure S22**. MS1 and MS2 spectra of compound 22


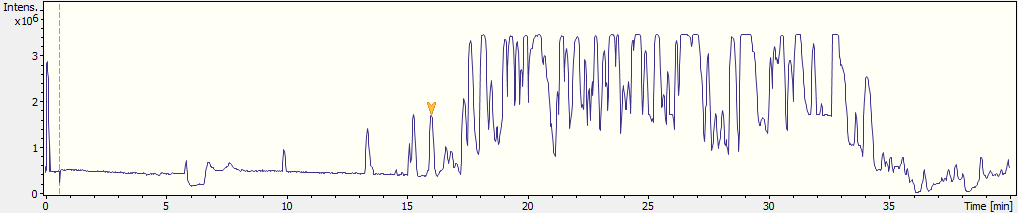


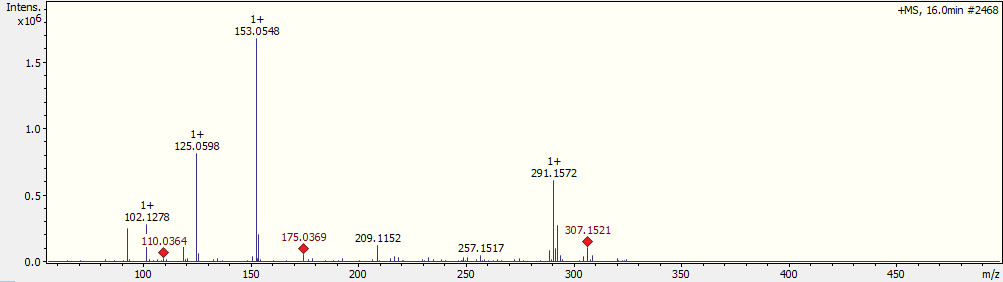

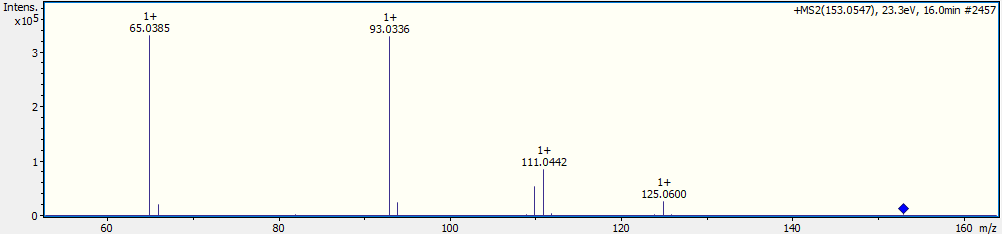


Figure S23. MS1 and MS2 spectra of compound 23


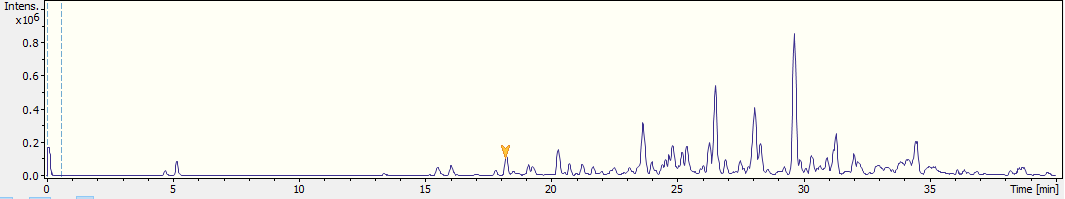

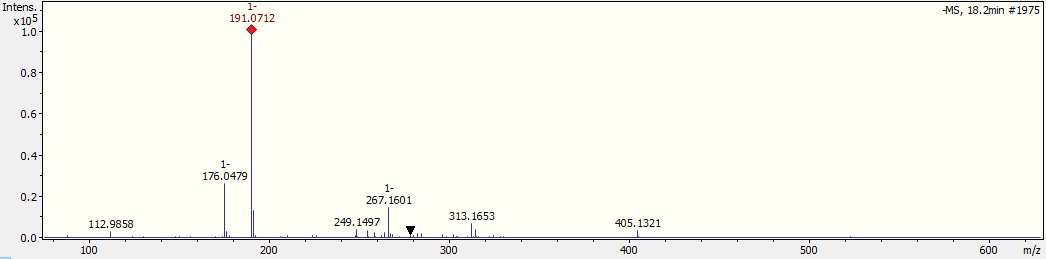

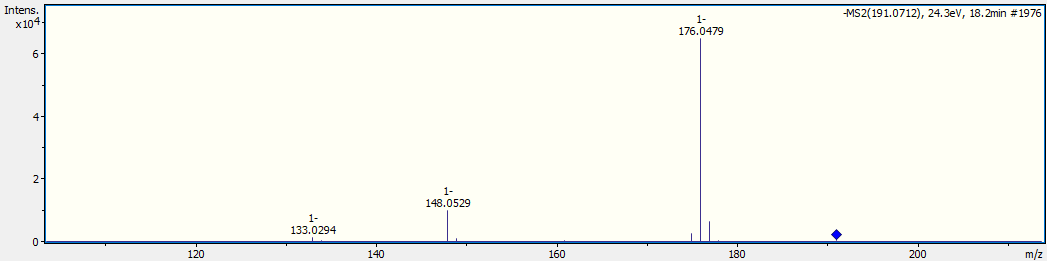


Figure S24. MS1 and MS2 spectra of compound 24


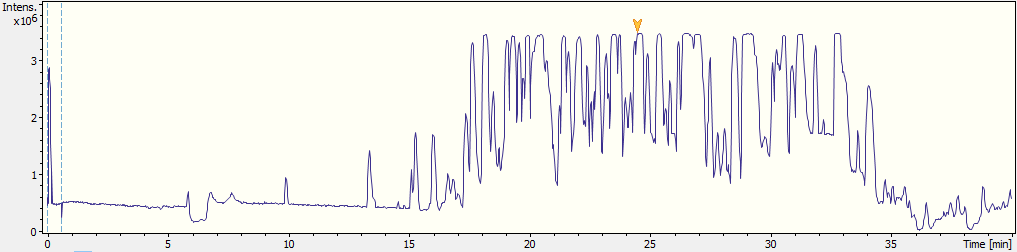

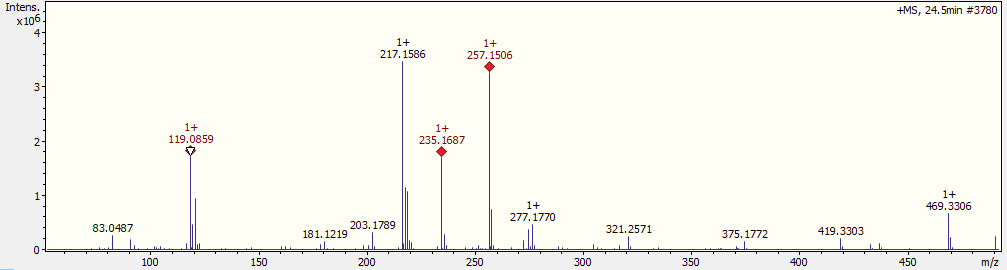

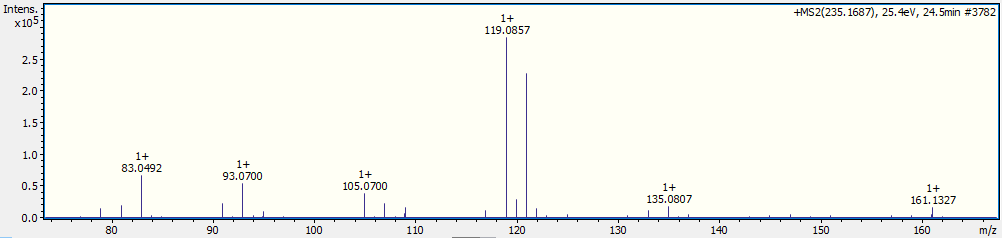


Figure S25. MS1 and MS2 spectra of compound 25


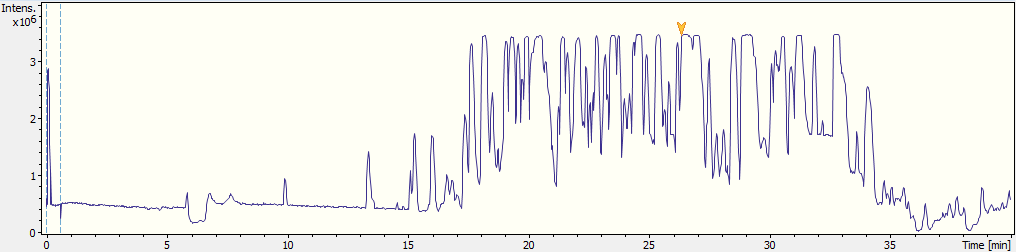

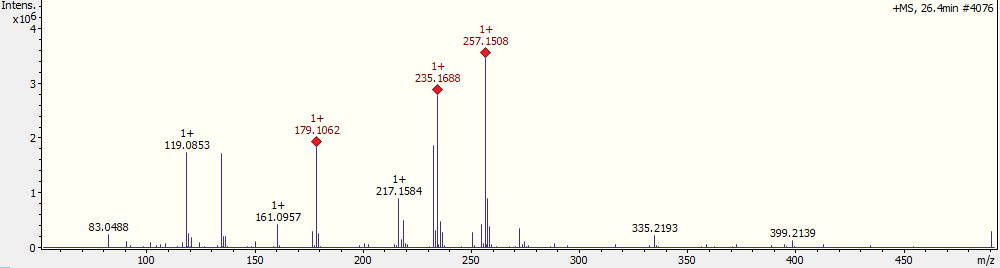

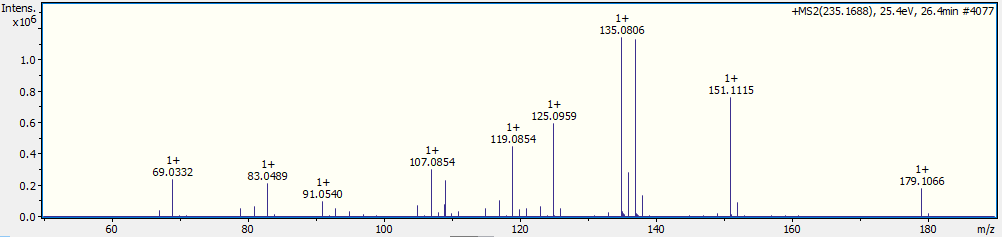


Figure S26. MS1 and MS2 spectra of compound 26


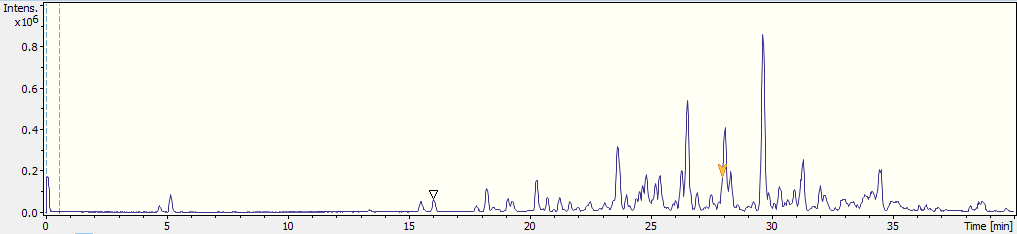

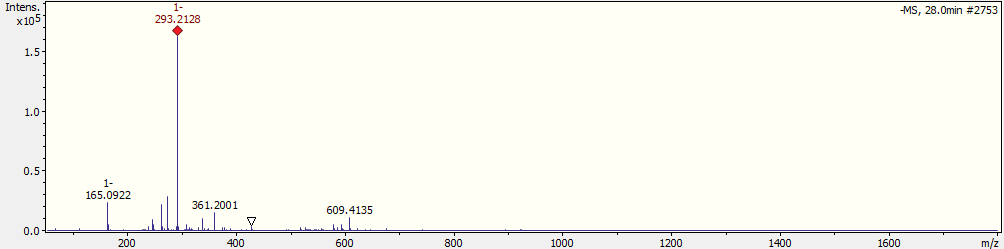

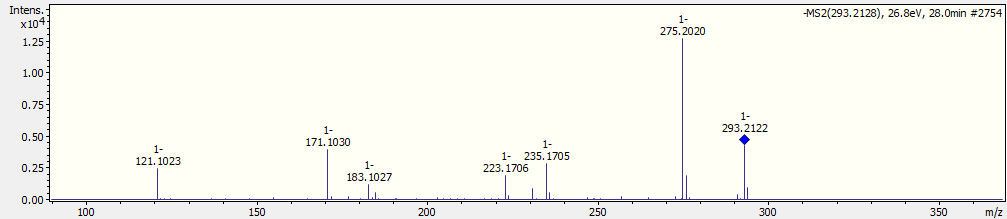


Figure S27. MS1 and MS2 spectra of compound 27


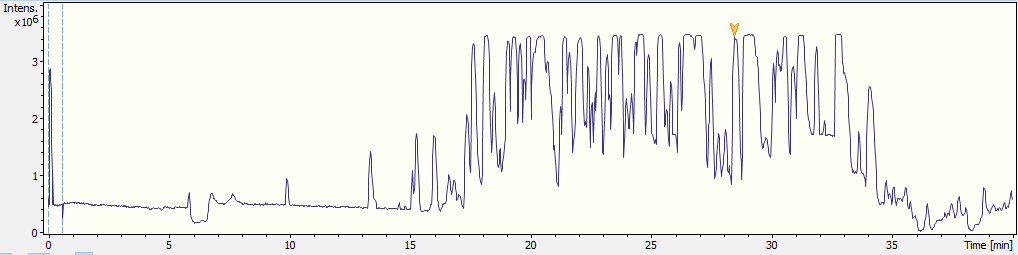

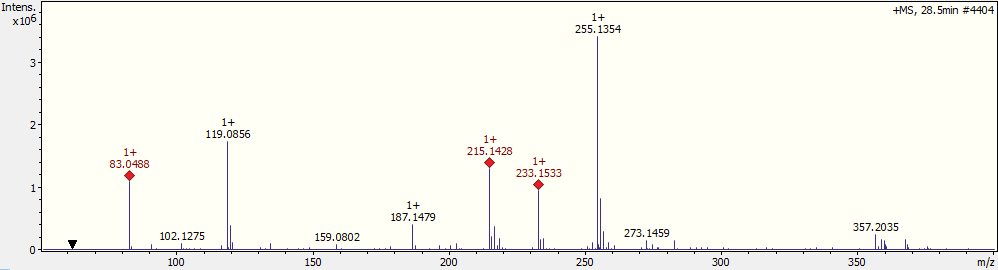

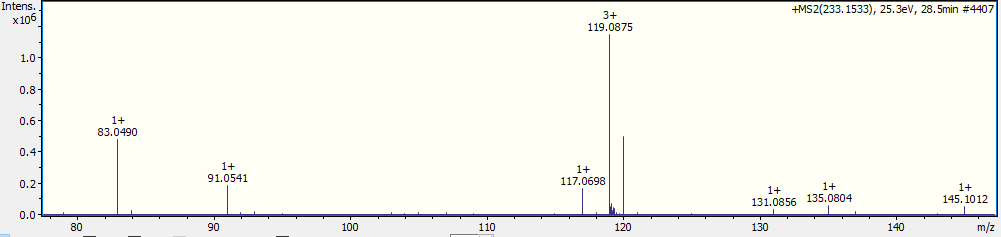


Figure S28. MS1 and MS2 spectra of compound 28


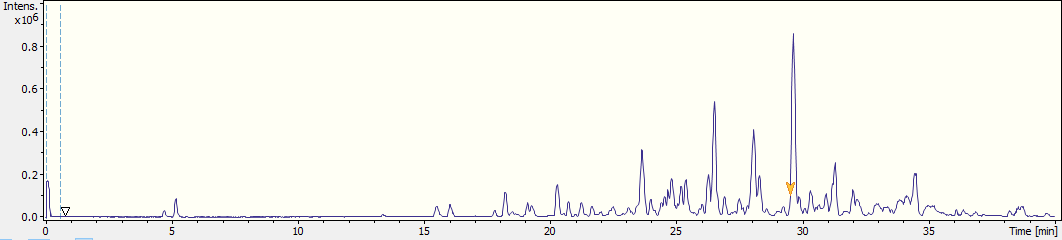

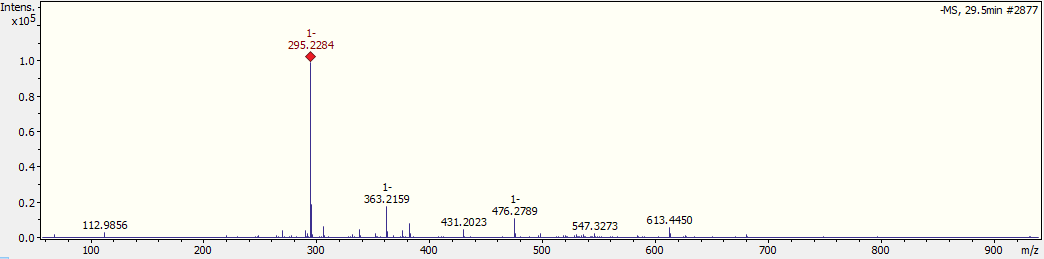

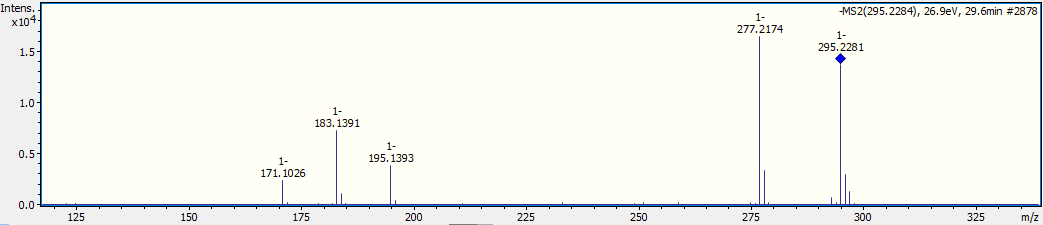


Figure S29. MS1 and MS2 spectra of compound 29


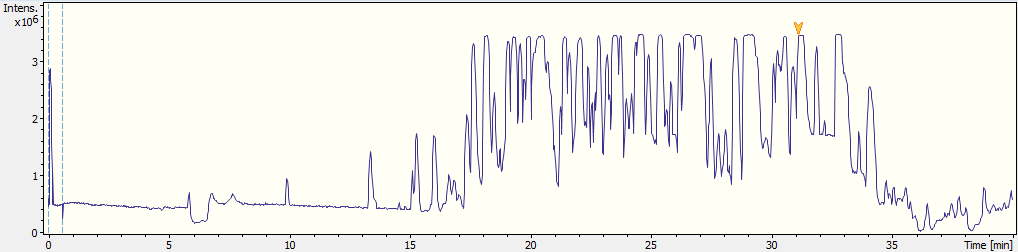

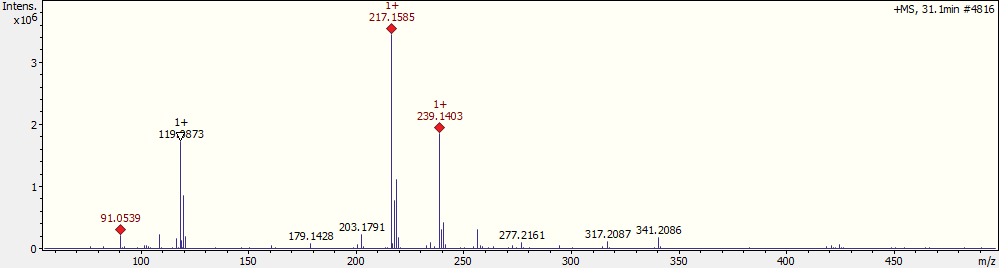

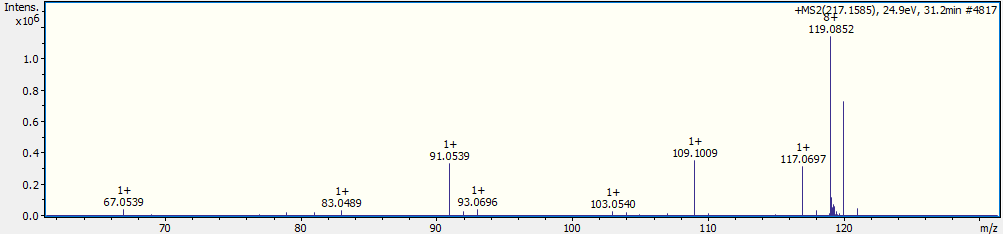


Figure S30. MS1 and MS2 spectra of compound 30

**Figure S31**.Observed fragmentation pattern of compound 8 in (–)-ESI mode.

**Figure S32**.Observed fragmentation pattern of compound 16 in (+)-ESI mode.

**Figure S33**.Observed fragmentation pattern of compound 17 in (+)-ESI mode.

**Figure S34**.Observed fragmentation pattern of compound 18 in (+)-ESI mode.

**Figure S35**.Observed fragmentation pattern of compound 19 in (+)-ESI mode.
